# Supplementary material for: 3D-Printed Nanocellulose-Based Cushioning–Antibacterial Dual-Function Food Packaging Aerogel
Source: Molecules. 2021 Jun 10;26(12):3543. doi: 10.3390/molecules26123543 (PMC8228327; doi:10.3390/molecules26123543)
Supplement: Supplementary file 1 [file molecules-26-03543-s001.zip › molecules-1244806-supplementary.pdf]

## Supplementary Materials

# 3D printed nanocellulose-based cushioning-antibacterial dual-function food packaging areogel

Wei Zhou<sup>1</sup>, Jiawei Fang<sup>1</sup>, Shuwei Tang, Zhengguo Wu\* and Xiaoying Wang

State Key Laboratory of Pulp and Paper Engineering, South China University of Technology, 381 Wushan Road, Tianhe District, Guangzhou, 510640, China

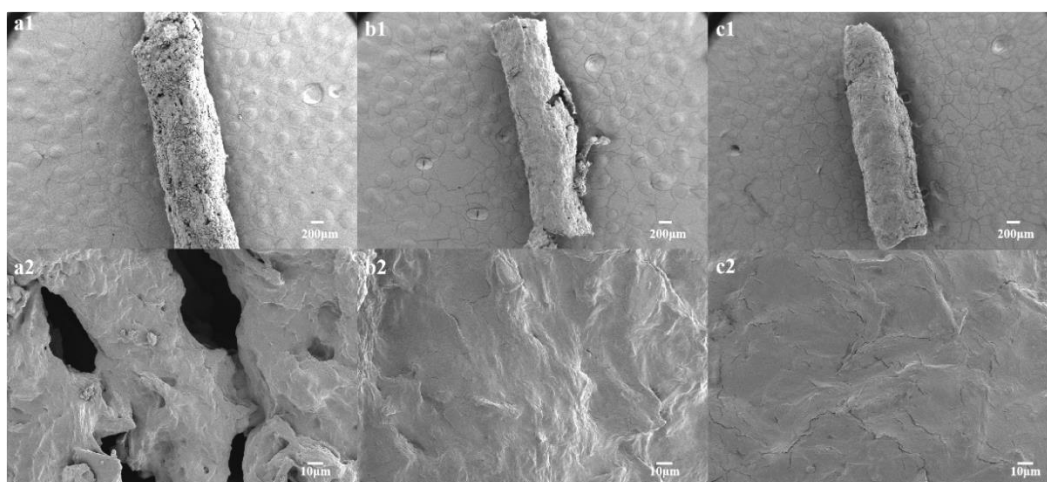

**Figure S1.** Microscopic morphology of (a1, a2) CNGA<sub>25-7</sub>; (b1, b2) CNGA<sub>50-7</sub>; (c1, c2) CNGA<sub>75-7</sub> after freeze-drying.

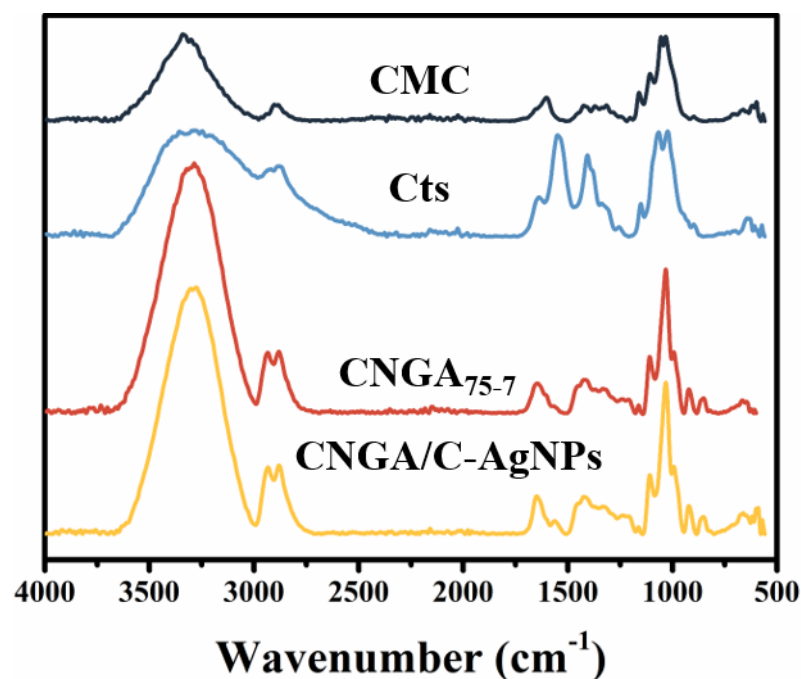

**Figure S2.** FT-IR spectra of CMC, Cts, CNGA<sub>75-7</sub> and CNGA/C-AgNPs.
